# Supplementary material for: Sodium Glucose Co-Transporter-2 (SGLT2) Inhibitors: A Review of Their Basic and Clinical Pharmacology
Source: Springer Nature journal article supplement (doi:10.1007/s13300-014-0089-4), 2014-11-26
Supplement: MOESM1 [file 9263278]

- Sodium-glucose co-transporter-2 inhibitors (SGLT2i) are a newly-developed class of oral anti-diabetic drugs (OADs) with a unique mechanism of action.
- This class includes canagliflozin, dapagliflozin, and empagliflozin.
- This review describes the biochemistry and physiology underlying the use of SGLT2i, and their clinical pharmacology, including mechanism of action and posology; the pragmatic placement of these molecules in the existing OAD arena is also discussed.
- SGLT2i work by enhancing glucose excretion through the renal tubules.
- The drugs have favorable impact on various metabolic parameters, including body weight, blood pressure, and perhaps lipid profile.

This summary slide represents the opinions of the authors. No funding or sponsorship was received for this study or publication of this article. For a full list of acknowledgments and conflicts of interest for all authors of this article, please see the full text online. Copyright © The Author 2014. Creative Commons Attribution Noncommercial License (CC BY-NC).
